# Supplementary material for: Identifying the Critical Threshold for Long-Term Pediatric Neurological Hospitalizations of the Offspring in Preterm Delivery
Source: MDPI journal article supplement (doi:10.3390/jcm10132919), 2021-06-29
Supplement: s1 [file s1]

| ICD-9 Code | Diagnosis                                                                         |
|------------|-----------------------------------------------------------------------------------|
| 3071       | ANOREXIA NERVOSA                                                                  |
| 3075       | OTHER AND UNSPECIFIED DISORDERS OF EATING                                         |
| 30750      | EATING DISORDER, UNSPECIFIED                                                      |
| 30751      | BULIMIA NERVOSA                                                                   |
| 30753      | RUMINATION DISORDER                                                               |
| 30759      | OTHER DISORDERS OF EATING                                                         |
| V691       | INAPPROPRIATE DIET & EATING HABITS                                                |
| 3073       | STEREOTYPIC MOVEMENT DISORDER                                                     |
| 3331       | ESSENTIAL AND OTHER SPECIFIED FORMS OF TREMOR                                     |
| 3332       | MYOCLONUS                                                                         |
| 3335       | OTHER CHOREAS                                                                     |
| 3336       | GENETIC TORSION DYSTONIA                                                          |
| 3336       | IDIOPATHIC TORSION DYSTONIA                                                       |
| 3343       | OTHER CEREBELLAR ATAXIA                                                           |
| 3450       | GENERALIZED NONCONVULSIVE EPILEPSY                                                |
| 3452       | PETIT MAL STATUS, EPILEPTIC                                                       |
| 3453       | GRAND MAL STATUS, EPILEPTIC                                                       |
| 3455       | PARTIAL EPILEPSY, WITHOUT IMPAIRMENT OF CONSCIOUSNESS                             |
| 3456       | INFANTILE SPASMS                                                                  |
| 3459       | EPILEPSY, UNSPECIFIED                                                             |
| 7810       | ABNORMAL INVOLUNTARY MOVEMENTS                                                    |
| 7812       | ABNORMALITY OF GAIT                                                               |
| 7813       | LACK OF COORDINATION                                                              |
| 33390      | UNSP.EXTRAPYRAMIDAL DISEASE + ABNORMAL MOVEMENT DISORDER                          |
| 33399      | OTHER EXTRAPYRAMIDAL DISEASES AND ABNORMAL MOVEMENT DISORDERS                     |
| 34500      | GENERALIZED NONCONVULSIVE EPILEPSY WITHOUT INTRACTABLE EPILEPSY                   |
| 34501      | GENERALIZED NONCONVULSIVE EPILEPSY WITH INTRACTABLE EPILEPSY                      |
| 34510      | GENERALIZED CONVULSIVE EPILEPSY WITHOUT INTRACTABLE EPILEPSY                      |
| 34511      | GENERALIZED CONVULSIVE EPILEPSY WITH INTRACTABLE EPILEPSY                         |
| 34540      | PARTIAL EPILEPSY+IMPAIRMENT OF CONSCIOUSNESS WITHOUT INTRACTABLE EPILEPSY         |
| 34550      | PARTIAL EPILEPSY WITHOUT IMPAIRMENT OF CONSCIOUSNESS WITHOUT INTRACTABLE EPILEPSY |
| 34560      | INFANTILE SPASMS WITHOUT INTRACTABLE EPILEPSY                                     |
| 34590      | EPILEPSY, UNSP. WITHOUT INTRACTABLE EPILEPSY                                      |
| 34590      | EPILEPSY, UNSP. WITHOUT INTRACTABLE EPILEPSY                                      |
| 34591      | EPILEPSY UNSP. WITH INTRACTABLE EPILEPSY                                          |
| 78031      | FEBRILE CONVULSIONS                                                               |
| 78031      | FEBRILE CONVULSIONS (SIMPLE), UNSPECIFIED                                         |
| 78032      | COMPLEX FEBRILE CONVULSIONS                                                       |

|       |                                                                   |
|-------|-------------------------------------------------------------------|
| 78039 | OTHER CONVULSIONS                                                 |
| 78099 | OTHER GENERAL SYMPTOMS                                            |
| 3341  | HEREDITARY SPASTIC PARAPLEGIA                                     |
| 3421  | SPASTIC HEMIPLEGIA                                                |
| 3429  | HEMIPLEGIA, UNSPECIFIED                                           |
| 3430  | CONGENITAL DIPLEGIA                                               |
| 3431  | CONGENITAL HEMIPLEGIA                                             |
| 3432  | CONGENITAL QUADRIPLÉGIA                                           |
| 3439  | INFANTILE CEREBRAL PALSY, UNSPECIFIED                             |
| 3441  | PARAPLEGIA                                                        |
| 3442  | DIPLEGIA OF UPPER LIMBS                                           |
| 3449  | PARALYSIS, UNSPECIFIED                                            |
| 3481  | ANOXIC BRAIN DAMAGE                                               |
| 3526  | MULTIPLE CRANIAL NERVE PALSIES                                    |
| 7814  | TRANSIENT PARALYSIS OF LIMB                                       |
| 34210 | SPASTIC HEMIPLEGIA AFFECTING UNSP. SIDE                           |
| 34290 | HEMIPLEGIA, UNSP., AFFECTING UNSP. SIDE                           |
| 34291 | HEMIPLEGIA, UNSP., AFFECTING DOMINANT SIDE                        |
| 34292 | HEMIPLEGIA, UNSP., AFFECTING NONDOMINANT SIDE                     |
| 34400 | QUADRIPLÉGIA, UNSPECIFIED                                         |
| 34430 | MONOPLÉGIA OF LOWER LIMB, AFFECTING UNSP. SIDE                    |
| 34440 | MONOPLÉGIA OF UPPER LIMB, AFFECTING UNSP. SIDE                    |
| 34489 | OTHER SPECIFIED PARALYTIC SYNDROME                                |
| 43811 | APHASIA                                                           |
| 43820 | HEMIPLEGIA AFFECTING UNSP. SIDE                                   |
| 309   | ADJUSTMENT REACTION                                               |
| 311   | DEPRESSIVE DISORDER, NOT ELSEWHERE CLASSIFIED                     |
| 316   | PSYCHIC FACTORS ASSOCIATED WITH DISEASES CLASSIFIED ELSEWHERE     |
| 2930  | ACUTE DELIRIUM                                                    |
| 2930  | DELIRIUM DUE TO CONDITIONS CLASSIFIED ELSEWHERE                   |
| 2940  | AMNESTIC DISORDER IN CONDITIONS CLASSIFIED ELSEWHERE              |
| 2949  | UNSPECIFIED PERSISTENT MENTAL DISORDERS DUE TO COND.CLASS.ELSEWH. |
| 2971  | DELUSIONAL DISORDER                                               |
| 2979  | UNSPECIFIED PARANOID STATE                                        |
| 2981  | EXCITATIVE TYPE PSYCHOSIS                                         |
| 2983  | ACUTE PARANOID REACTION                                           |
| 2989  | UNSPECIFIED PSYCHOSIS                                             |
| 3003  | OBSESSIVE-COMPULSIVE DISORDERS                                    |
| 3004  | DYSTHYMIC DISORDER                                                |
| 3004  | NEUROTIC DEPRESSION                                               |
| 3009  | UNSPECIFIED NONPSYCHOTIC MENTAL DISORDER                          |

|       |                                                                |
|-------|----------------------------------------------------------------|
| 3019  | UNSPECIFIED PERSONALITY DISORDER                               |
| 3026  | DISORDERS OF PSYCHOSEXUAL IDENTITY                             |
| 3051  | TOBACCO USE DISORDER (TOBACCO DEPENDENCE)                      |
| 3061  | RESPIRATORY MALFUNCTION ARISING FROM MENTAL FACTORS            |
| 3062  | CARDIOVASCULAR MALFUNCTION ARISING FROM MENTAL FACTORS         |
| 3068  | OTHER SPECIFIED PSYCHOPHYSIOLOGICAL MALFUNCTION                |
| 3069  | UNSPECIFIED PSYCHOPHYSIOLOGICAL MALFUNCTION                    |
| 3070  | ADULT ONSET FLUENCY DISORDER                                   |
| 3070  | STAMMERING AND STUTTERING                                      |
| 3070  | STUTTERING                                                     |
| 3080  | PREDOMINANT DISTURBANCE OF EMOTIONS                            |
| 3089  | UNSPECIFIED ACUTE REACTION TO STRESS                           |
| 3090  | ADJUSTMENT DISORDER WITH DEPRESSED MOOD                        |
| 3094  | ADJUSTMENT DISOR.WITH MIXED DISTURB.OF EMOTIONS AND CONDUCT    |
| 3099  | UNSPECIFIED ADJUSTMENT REACTION                                |
| 3129  | UNSPECIFIED DISTURBANCE OF CONDUCT                             |
| 3139  | UNSPECIFIED EMOTIONAL DISTURBANCE OF CHILDHOOD OR ADOLESCENCE  |
| 7801  | HALLUCINATIONS                                                 |
| 7803  | CONVULSIONS                                                    |
| 7992  | NERVOUSNESS                                                    |
| 7993  | DEBILITY, UNSPECIFIED                                          |
| 29384 | ANXIETY DISORDER IN CONDITIONS CLASSIFIED ELSEWHERE            |
| 29530 | PARANOID TYPE SCHIZOPHRENIA, UNSPECIFIED STATE                 |
| 29570 | SCHIZOAFFECTIVE DISORDER SCHIZOPHRENIA, UNSPECIFIED STATE      |
| 29580 | OTHER SPECIFIED TYPES OF SCHIZOPHRENIA, UNSPECIFIED STATE      |
| 29590 | UNSPECIFIED TYPE SCHIZOPHRENIA, UNSPECIFIED STATE              |
| 29600 | BIPOLAR I DISORDER, SINGLE MANIC EPISODE, UNSPECIFIED DEGREE   |
| 29620 | MAJOR DEPRESSIVE AFFECTIVE DISORDER,SINGLE EPISODE,UNSP.DEGREE |
| 29680 | BIPOLAR DISORDER, UNSPECIFIED                                  |
| 29690 | UNSPECIFIED EPISODIC MOOD DISORDER                             |
| 29699 | OTHER SPECIFIED AFFECTIVE PSYCHOSES                            |
| 30000 | ANXIETY STATE, UNSPECIFIED                                     |
| 30001 | PANIC DISORDER WITHOUT AGORAPHOBIA                             |
| 30009 | OTHER ANXIETY STATES                                           |
| 30010 | HYSTERIA, UNSPECIFIED                                          |
| 30011 | CONVERSION DISORDER                                            |
| 30029 | OTHER ISOLATED OR SIMPLE PHOBIAS                               |
| 30183 | BORDERLINE PERSONALITY                                         |
| 30183 | BORDERLINE PERSONALITY DISORDER                                |
| 30302 | AC.ALCOHOLIC INTOXIC.IN ALCOHOLISM,EPISODIC DRINKING BEHAVIOR  |
| 30400 | OPIOID TYPE DEPENDENCE, UNSPECIFIED USE                        |

|       |                                                                  |
|-------|------------------------------------------------------------------|
| 30430 | CANNABIS DEPENDENCE, UNSPECIFIED USE                             |
| 30432 | CANNABIS DEPENDENCE, EPISODIC USE                                |
| 30500 | ALCOHOL ABUSE, UNSPECIFIED DRINKING BEHAVIOR                     |
| 30501 | ALCOHOL ABUSE, CONTINUOUS DRINKING BEHAVIOR                      |
| 30502 | ALCOHOL ABUSE, EPISODIC DRINKING BEHAVIOR                        |
| 30591 | OTHER, MIXED, OR UNSPECIFIED DRUG ABUSE, CONTINUOUS USE          |
| 30720 | TIC DISORDER, UNSPECIFIED                                        |
| 30722 | CHRONIC MOTOR OR VOCAL TIC DISORDER                              |
| 30723 | TOURETTE'S DISORDER                                              |
| 30752 | PICA                                                             |
| 30924 | ADJUSTMENT DISORDER WITH ANXIETY                                 |
| 30981 | POSTTRAUMATIC STRESS DISORDER                                    |
| 31210 | UNDERSOCIALIZED CONDUCT DISORDER, UNAGGRESSIVE TYPE, UNSPECIFIED |
| 31239 | OTHER DISORDERS OF IMPULSE CONTROL                               |
| 31389 | OTHER EMOTIONAL DISTURBANCES OF CHILDHOOD OR ADOLESCENCE         |
| 79921 | NERVOUSNESS                                                      |
| 79922 | IRRITABILITY                                                     |
| 79925 | DEMORALIZATION AND APATHY                                        |
| 79929 | OTHER SIGNS AND SYMPTOMS INVOLVING EMOTIONAL STATE               |
| V6284 | SUICIDAL IDEATION                                                |
| 3142  | HYPERKINETIC CONDUCT DISORDER OF CHILDHOOD                       |
| 3149  | UNSPECIFIED HYPERKINETIC SYNDROME OF CHILDHOOD                   |
| 31400 | ATTENTION DEFICIT DISORDER WITHOUT HYPERACTIVITY                 |
| 31401 | ATTENTION DEFICIT DISORDER WITH HYPERACTIVITY                    |
| V400  | MENTAL AND BEHAVIORAL PROBLEMS WITH LEARNING                     |
| V409  | UNSPECIFIED MENTAL OR BEHAVIORAL PROBLEM                         |
| 317   | MILD INTELLECTUAL DISABILITIES                                   |
| 317   | MILD MENTAL RETARDATION                                          |
| 319   | UNSPECIFIED INTELLECTUAL DISABILITIES                            |
| 319   | UNSPECIFIED MENTAL RETARDATION                                   |
| 3152  | OTHER SPECIFIC DEVELOPMENTAL LEARNING DIFFICULTIES               |
| 3154  | DEVELOPMENTAL COORDINATION DISORDER                              |
| 3158  | OTHER SPECIFIED DELAYS IN DEVELOPMENT                            |
| 3159  | UNSPECIFIED DELAY IN DEVELOPMENT                                 |
| 7834  | LACK OF EXPECTED NORMAL PHYSIOLOGICAL DEVELOPMENT                |
| 7834  | LACK OF EXPECTED NORMAL PHYSIOLOGICAL DEVELOPMENT IN CHILDHOOD   |
| 31531 | EXPRESSIVE LANGUAGE DISORDER                                     |
| 31534 | SPEECH AND LANGUAGE DEVELOPMENTAL DELAY DUE TO HEARING LOSS      |
| 31539 | OTHER DEVELOPMENTAL SPEECH DISORDER                              |
| 33183 | MILD COGNITIVE IMPAIRMENT, SO STATED                             |
| 78340 | LACK OF NORMAL PHYSIOLOGICAL DEVELOPMENT, UNSPECIFIED            |

|        |                                                              |
|--------|--------------------------------------------------------------|
| 330    | CEREBRAL DEGENERATIONS USUALLY MANIFEST IN CHILDHOOD         |
| 335    | ANTERIOR HORN CELL DISEASE                                   |
| 340    | MULTIPLE SCLEROSIS                                           |
| 3300   | LEUKODYSTROPHY                                               |
| 3308   | OTHER SPECIFIED CEREBRAL DEGENERATIONS IN CHILDHOOD          |
| 3313   | COMMUNICATING HYDROCEPHALUS                                  |
| 3314   | OBSTRUCTIVE HYDROCEPHALUS                                    |
| 3319   | CEREBRAL DEGENERATION, UNSPECIFIED                           |
| 3348   | OTHER SPINOCEREBELLAR DISEASES                               |
| 3350   | WERDNIG-HOFFMANN DISEASE                                     |
| 3360   | SYRINGOMYELIA AND SYRINGOBULBIA                              |
| 3410   | NEUROMYELITIS OPTICA                                         |
| 3411   | SCHILDER'S DISEASE                                           |
| 3419   | DEMYELINATING DISEASE OF CENTRAL NERVOUS SYSTEM, UNSPECIFIED |
| 3480   | CEREBRAL CYSTS                                               |
| 3590   | CONGENITAL HEREDITARY MUSCULAR DYSTROPHY                     |
| 3591   | HEREDITARY PROGRESSIVE MUSCULAR DYSTROPHY                    |
| 33189  | OTHER CEREBRAL DEGENERATION                                  |
| 33510  | SPINAL MUSCULAR ATROPHY, UNSPECIFIED                         |
| 33522  | PROGRESSIVE BULBAR PALSY                                     |
| 33523  | PSEUDOBULBAR PALSY                                           |
| 34120  | ACUTE (TRANSVERSE) MYELITIS NOS                              |
| 348891 | CEREBRAL CALCIFICATION                                       |
| 3313 2 | POST HEMORRHAGIC HYDROCEPHALUS                               |
| 352    | DISORDERS OF OTHER CRANIAL NERVES                            |
| 3379   | UNSPECIFIED DISORDER OF AUTONOMIC NERVOUS SYSTEM             |
| 3510   | BELL'S PALSY                                                 |
| 3518   | OTHER FACIAL NERVE DISORDERS                                 |
| 3519   | FACIAL NERVE DISORDER, UNSPECIFIED                           |
| 3539   | UNSPECIFIED NERVE ROOT AND PLEXUS DISORDER                   |
| 3542   | LESION OF ULNAR NERVE                                        |
| 3548   | OTHER MONONEURITIS OF UPPER LIMB                             |
| 3549   | MONONEURITIS OF UPPER LIMB, UNSPECIFIED                      |
| 3553   | LESION OF LATERAL POPLITEAL NERVE                            |
| 3556   | LESION OF PLANTAR NERVE                                      |
| 3558   | MONONEURITIS OF LOWER LIMB, UNSPECIFIED                      |
| 3559   | MONONEURITIS OF UNSPECIFIED SITE                             |
| 3562   | HEREDITARY SENSORY NEUROPATHY                                |
| 3564   | IDIOPATHIC PROGRESSIVE POLYNEUROPATHY                        |
| 3568   | OTHER SPECIFIED IDIOPATHIC PERIPHERAL NEUROPATHY             |
| 3569   | UNSPECIFIED IDIOPATHIC PERIPHERAL NEUROPATHY                 |

|       |                                                  |
|-------|--------------------------------------------------|
| 3570  | ACUTE INFECTIVE POLYNEURITIS                     |
| 3571  | POLYNEUROPATHY IN COLLAGEN VASCULAR DISEASE      |
| 3572  | POLYNEUROPATHY IN DIABETES                       |
| 3577  | POLYNEUROPATHY DUE TO OTHER TOXIC AGENTS         |
| 3588  | OTHER SPECIFIED MYONEURAL DISORDERS              |
| 3589  | MYONEURAL DISORDERS, UNSPECIFIED                 |
| 3592  | MYOTONIC DISORDERS                               |
| 3599  | MYOPATHY, UNSPECIFIED                            |
| 33709 | OTHER IDIOPATHIC PERIPHERAL AUTONOMIC NEUROPATHY |
| 33720 | REFLEX SYMPATHETIC DYSTROPHY, UNSPECIFIED        |
| 33721 | REFLEX SYMPATHETIC DYSTROPHY OF UPPER LIMB       |
| 33722 | REFLEX SYMPATHETIC DYSTROPHY OF LOWER LIMB       |
| 35781 | CHRONIC INFLAMMATORY DEMYELINATING POLYNEURITIS  |
| 35800 | MYASTHENIA GRAVIS WITHOUT (ACUTE) EXACERBATION   |
| 3383  | NEOPLASM RELATED PAIN (ACUTE) (CHRONIC)          |
| 3384  | CHRONIC PAIN SYNDROME                            |
| 3482  | BENIGN INTRACRANIAL HYPERTENSION                 |
| 3483  | ENCEPHALOPATHY, UNSPECIFIED                      |
| 3483  | ENCEPHALOPATHY,NOT ELSEWHERE CLASSIFIED          |
| 3490  | REACTION TO SPINAL OR LUMBAR PUNCTURE            |
| 3492  | DISORDERS OF MENINGES, NOT ELSEWHERE CLASSIFIED  |
| 3499  | UNSPECIFIED DISORDERS OF NERVOUS SYSTEM          |
| 3561  | PERONEAL MUSCULAR ATROPHY                        |
| 7802  | SYNCOPE AND COLLAPSE                             |
| 7843  | APHASIA                                          |
| 30789 | OTHER PSYCHALGIA                                 |
| 33381 | BLEPHAROSPASM                                    |
| 33819 | OTHER ACUTE PAIN                                 |
| 33829 | OTHER CHRONIC PAIN                               |
| 33903 | EPISODIC PAROXYSMAL HEMICRANIA                   |
| 34830 | ENCEPHALOPATHY, UNSPECIFIED                      |
| 34831 | METABOLIC ENCEPHALOPATHY                         |
| 34881 | TEMPORAL SCLEROSIS                               |
| 34889 | OTHER CONDITIONS OF BRAIN                        |
| 34981 | CEREBROSPINAL FLUID RHINORRHEA                   |
| 34989 | OTHER SPECIFIED DISORDERS OF NERVOUS SYSTEM      |
| 78093 | MEMORY LOSS                                      |
| 99701 | CENTRAL NERVOUS SYSTEM COMPLICATION              |
| 99709 | OTHER NERVOUS SYSTEM COMPLICATIONS               |
